# Supplementary material
Source: publisher site journal article supplement (https://static.cambridge.org/content/id/urn:cambridge.org:id:article:S0016756820000400/resource/name/S0016756820000400supp001.xlsx)
Supplement: Supplementary file 1 [file S0016756820000400supp001.xlsx]

## Sheet: Standards
Geological Magazine: Late Jurassic Changmar Complex from the Shyok ophiolite, NW Himalaya: A prelude to the Ladakh Arc
Authors: Wanchese M. Saktura*1, Solomon Buckman1, Allen P. Nutman1 and Vickie C. Bennett2
Affiliations: (1) GeoQuEST Research Centre, School of Earth, Atmospheric and Life Sciences, University of Wollongong, Wollongong, NSW 2522, Australia (2) Research School of Earth Sciences, Australian National University, Canberra, ACT 2601, Australia
Supplementary Material
Analysis conducted on 12th of January 2017 using SHRIMP RG - zircon mount W63
Labels	U	Th	Th/U	comm		238U/206Pb			207Pb/206Pb			238U/206Pb			207Pb/206Pb			206Pb/238U
	ppm	ppm		f206%		ratio (unc)			ratio (unc)			ratio (204corr)			ratio (204corr)			date (Ma, 207corr)
TEMORA-2 reference material (with sample 16NU08 on mount W63)
TEM-1.1	168	63.168	0.376	-0.05	14.74	±	0.268	0.0548	±	0.0018	14.7606	±	0.2683	0.053	±	0.0028	423.6	±	4.768
TEM-1.2	119	43.792	0.368	0.12	14.68	±	0.3122	0.0564	±	0.0022	14.6842	±	0.3123	0.0552	±	0.003	424.8	±	5.651
TEM-3.1	292	116.8	0.4	0.05	15.69	±	0.2203	0.0551	±	0.0014	15.7037	±	0.2204	0.0538	±	0.002	398.3	±	3.478
TEM-4.1	307	173.455	0.565	0.11	15.05	±	0.2024	0.056	±	0.0013	15.0643	±	0.2026	0.0544	±	0.002	414.6	±	3.422
TEMORA-2 reference material (with sample 16NU09 on mount W63)
TEM-5.1	577	315.619	0.547	0.07	14.81	±	0.1431	0.0558	±	0.001	14.8093	±	0.1431	0.0552	±	0.0012	421.3	±	2.52
TEM-4.2	339	143.058	0.422	0.02	14.86	±	0.1912	0.0553	±	0.0013	14.8458	±	0.191	0.0553	±	0.0013	420.2	±	3.346
TEM-7.1	296	187.368	0.633	0.14	14.73	±	0.1269	0.0566	±	0.0014	14.7543	±	0.1776	0.0549	±	0.002	422.9	±	4.927
TEM-10.1	196	64.484	0.329	0.2	14.83	±	0.2468	0.057	±	0.0017	14.8134	±	0.2466	0.057	±	0.0017	420.3	±	4.343
OG-1 reference material (on mount W63)
OG1-2.2	189	201.663	1.067	-0.58	1.4	±	0.0085	0.2981	±	0.0014	1.3971	±	0.0166	0.2981	±	0.0014	3496	±	32.226
